# Supplementary material for: Citizen Science Apps in a Higher Education Botany Course: Data Quality and Learning Effects
Source: MDPI journal article supplement (doi:10.3390/su151712984), 2023-08-29
Supplement: s1 [file s1]

Article

# Citizen Science Apps in a Higher Education Botany Course: Data Quality and Learning Effects

Nadja Pernat <sup>1,2\*</sup>, Anika Kristin Gathof <sup>1</sup>, Johann Herrmann <sup>3</sup>, Birgit Seitz <sup>4</sup> and Sascha Buchholz <sup>1,2</sup>

<sup>1</sup> Institute of Landscape Ecology, University of Münster, 48149 Münster, Germany; agathof@uni-muenster.de (A.K.G.); saschabuchholz@uni-muenster.de (S.B.)

<sup>2</sup> Centre for Integrative Biodiversity Research and Applied Ecology (CIBRA), University of Münster, 48149 Münster, Germany

<sup>3</sup> Institute for Bee Protection, Julius Kühn Institute (JKI), Federal Research Centre for Cultivated Plants, 38104 Braunschweig, Germany; johann.herrmann@julius-kuehn.de

<sup>4</sup> Department of Ecology, Technische Universität Berlin, 12165 Berlin, Germany; birgit.seitz@tu-berlin.de

\* Correspondence: nadjapernat@uni-muenster.com

**Table S1.** Top misidentified and missed species.

| Top misidentified              | Top missed                     |                             |
|--------------------------------|--------------------------------|-----------------------------|
| <i>Dactylis glomerata</i>      | <i>Poa angustifolia</i>        | <i>Hypericum perforatum</i> |
| <i>Potentilla reptans</i>      | <i>Elymus repens</i>           | <i>Festuca rubra</i> agg.   |
| <i>Festuca ovina</i>           | <i>Vicia angustifolia</i>      | <i>Rumex acetosella</i>     |
| <i>Rumex acetosa</i>           | <i>Setaria viridis</i>         | <i>Veronica arvensis</i>    |
| <i>Poa pratensis</i>           | <i>Vicia hirsuta</i>           | <i>Conyza canadensis</i>    |
| <i>Rumex acetosella</i>        | <i>Agrostis capillaris</i>     | <i>Draba verna</i>          |
| <i>Poa trivialis</i>           | <i>Cerastium semidecandrum</i> | <i>Vicia lathyroides</i>    |
| <i>Bothriochloa ischaemum</i>  | <i>Rumex thyrsiflorus</i>      | <i>Artemisia campestris</i> |
| <i>Hypochaeris glabra</i>      | <i>Trifolium arvense</i>       | <i>Bromus hordeaceus</i>    |
| <i>Capsella bursa-pastoris</i> | <i>Arabidopsis thaliana</i>    | <i>Crepis capillaris</i>    |
| <i>Lolium perenne</i>          | <i>Arenaria serpyllifolia</i>  | <i>Poa compressa</i>        |
| <i>Vicia sativa</i>            | <i>Calamagrostis epigejos</i>  | <i>Plantago lanceolata</i>  |
|                                | <i>Myosotis ramosissima</i>    | <i>Chondrilla juncea</i>    |
|                                | <i>Festuca brevipila</i>       |                             |
